# Supplementary material for: Stimulating antibacterial activities of graphitic carbon nitride nanosheets with plasma treatment
Source: Royal Society of Chemistry journal article supplement (doi:10.1039/c9nr03797g), 2019-01-01
Supplement: c9nr03797g2.pdf [file c9nr03797g2.pdf]

# Supporting Information:

## Stimulating Antibacterial Activities of Graphitic Carbon Nitride Nanosheets with Plasma Treatment

Haiying Cui,<sup>a†</sup> Zonglin Gu,<sup>b†</sup> Xiaochen Chen,<sup>c†</sup> Lin Lin,<sup>\*a</sup> Zegao Wang, Xing Dai,<sup>b</sup> Zaixing Yang,<sup>b</sup> Lei Liu,<sup>d</sup> Ruhong Zhou,<sup>\*e</sup> and Mingdong Dong<sup>\*c</sup>

<sup>a</sup>School of Food & Biological Engineering, Jiangsu University, Zhenjiang 212013, China

<sup>b</sup>Institute of Quantitative Biology and Medicine, Soochow University, Suzhou 215123,  
China

<sup>c</sup>Interdisciplinary Nanoscience Center, Aarhus University, Aarhus 8000, Denmark

<sup>d</sup>School of Materials, Jiangsu University, Zhenjiang 212013, China

<sup>e</sup>Department of Chemistry, Columbia University, New York 10027, United States

†These authors contributed equally

## Optimal Conditions of Nitrogen Plasma Treatment

In order to study the effects of power output and illumination time of plasma on the antibacterial activity of  $g-C_3N_4$ , and search for the best treatment conditions simultaneously, an optimization experiment was performed. The antibacterial activity of N- $g-C_3N_4$  was enhanced with the increased power of nitrogen plasma as expected (Figure S1a). The antibacterial efficiency of  $g-C_3N_4$  treated with 1000 W nitrogen plasma was more than 100 times that of  $g-C_3N_4$  treated with 200 W nitrogen plasma. However, the  $g-C_3N_4$  treated with 500, 750, and 1000 W nitrogen plasma had very similar antibacterial efficiency. The biggest difference was only 1.82 time between 1000 W and 500 W. Thus, 500 W was set as the optimal power of nitrogen plasma to save energy. With the treatment of 500 W nitrogen plasma for 1, 3, and 5min respectively, the antibacterial activities of N- $g-C_3N_4$  were shown as Figure S1b, Supporting Information. The influence of illumination time was much less than output power. Thence, 1 min was set as the optimal illumination time. All of the N- $g-C_3N_4$  samples used below were obtained by treating with nitrogen plasma at 500 W for 1min.

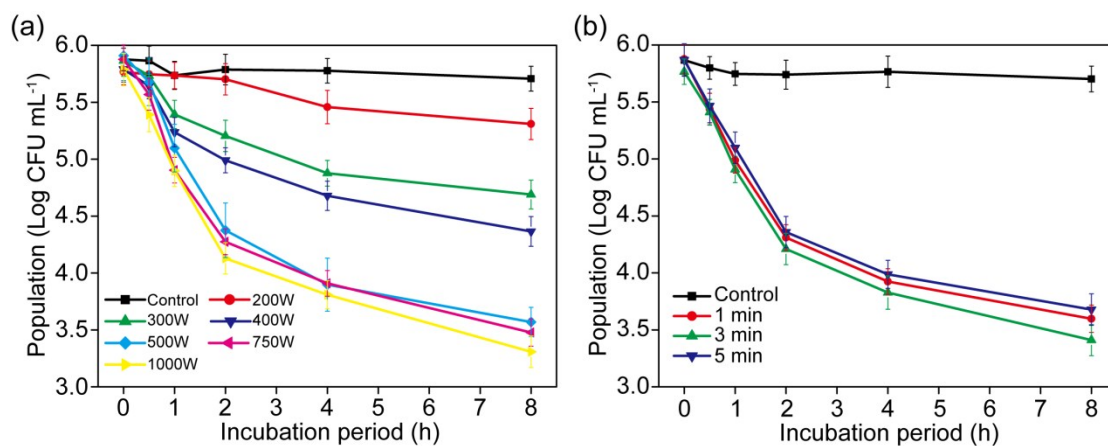

**Figure S1.** Optimization of plasma treatment conditions. a) Effects of different output powers of nitrogen plasma on antibacterial properties of N-g-C<sub>3</sub>N<sub>4</sub>; b) Effects of illumination time of 500W nitrogen plasma on antibacterial properties of N-g-C<sub>3</sub>N<sub>4</sub>.

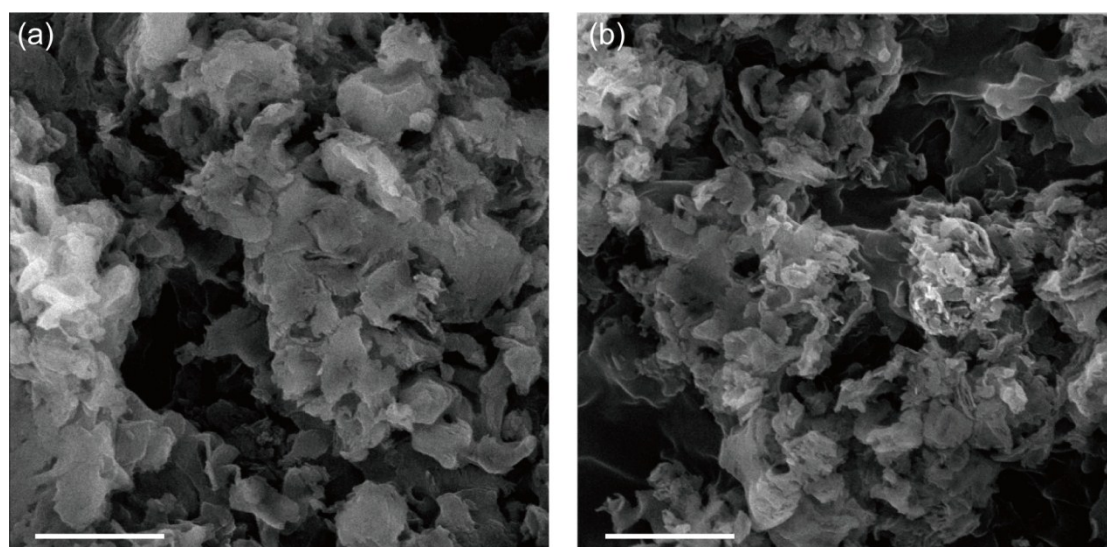

**Figure S2.** SEM image of the a) as prepared g-C<sub>3</sub>N<sub>4</sub> and b) N-g-C<sub>3</sub>N<sub>4</sub>. Most of the particles showed flake-like morphology. The scale bar is 1 μm.

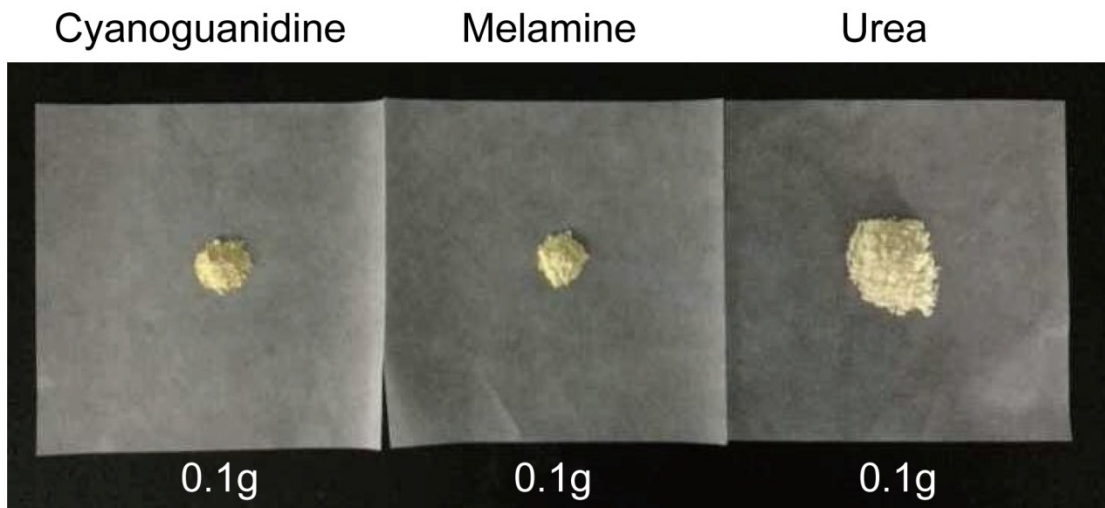

**Figure S3.** Influence of raw materials to apparent density of  $g-C_3N_4$  powders

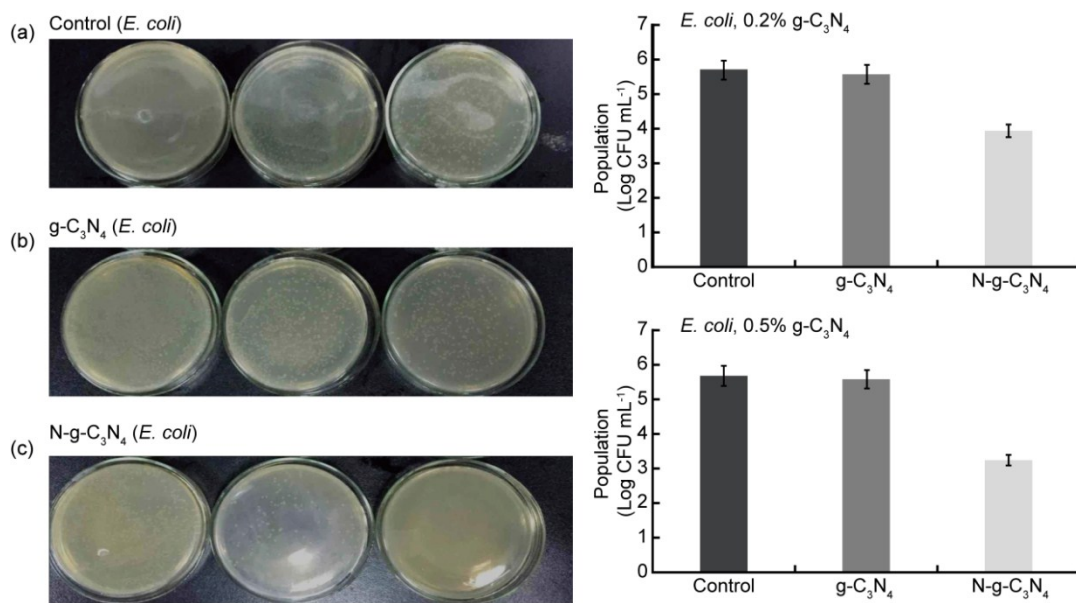

**Figure S4.** Left side: a-c) Influences of the bacterial concentrations to antibacterial efficiency for *E.coli*. Right side: influences of concentrations of  $g-C_3N_4$  to the antibacterial efficiency for *E.coli*.

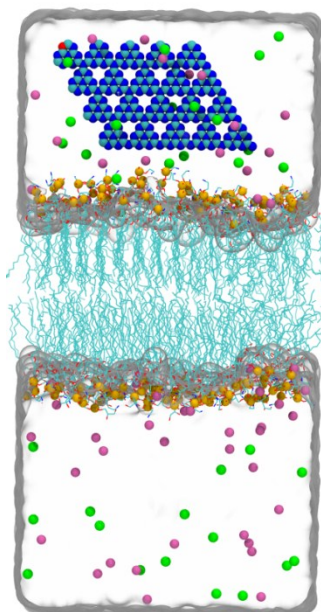

**Figure S5.** The simulation system of g-C<sub>3</sub>N<sub>4</sub> nanosheet interaction with bacterial membrane. The g-C<sub>3</sub>N<sub>4</sub> nanosheet was shown with cyan (carbon) and blue (nitrogen) spheres. One fixed atom on g-C<sub>3</sub>N<sub>4</sub> was displayed with red sphere. The phosphorus atoms of lipids were depicted by orange balls while other atoms of lipids were exhibited with lines. The Na<sup>+</sup> and Cl<sup>-</sup> ions were shown with purples and lime balls. The boundaries of the simulated periodic cell were shown with silver surfaces.

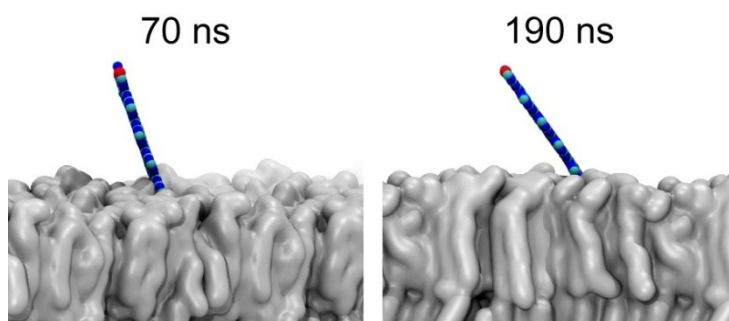

**Figure S6.** The g-C<sub>3</sub>N<sub>4</sub> orientation change when binding to membrane. The g-C<sub>3</sub>N<sub>4</sub> was shown with spheres while the lipids were displayed by gray surfaces.

**Table S1. Influence of raw materials to apparent density of g-C<sub>3</sub>N<sub>4</sub> powders**

| <b>Raw materials</b> | <b>Apparent density of powders</b> |
|----------------------|------------------------------------|
| Cyanoguanidine       | 0.404 g/cm <sup>3</sup>            |
| Melamine             | 0.359 g/cm <sup>3</sup>            |
| Urea                 | 0.057 g/cm <sup>3</sup>            |

**Table S2. Lennard-Jones parameters of g-C<sub>3</sub>N<sub>4</sub>.**

| <b>Element</b> | <b>nm</b> | <b>kJ/mol</b> |
|----------------|-----------|---------------|
| Carbon         | 0.340     | 0.360         |
| Nitrogen       | 0.325     | 0.711         |
